# Supplementary material
Source: ML conference proceedings conference paper supplement (https://openaccess.thecvf.com/content/ICCV2023/html/Wu_Efficient_View_Synthesis_ICCV_2023_paper.html)
Supplement: Supplementary file 2 [file Wu_Efficient_View_Synthesis_ICCV_2023_supplemental.zip]

Archive with 2 entries (2 files):
- 04339-supp/nerdf_supp.pdf
- 04339-supp/video.mp4
